# Supplementary material
Source: Springer Nature journal article supplement (https://www.springermedizin.de/resource/supplementary/12891_2006_267_MOESM3_ESM.pdf/9510898)

# Ratings by pedorthists & plantar pressure according to GS

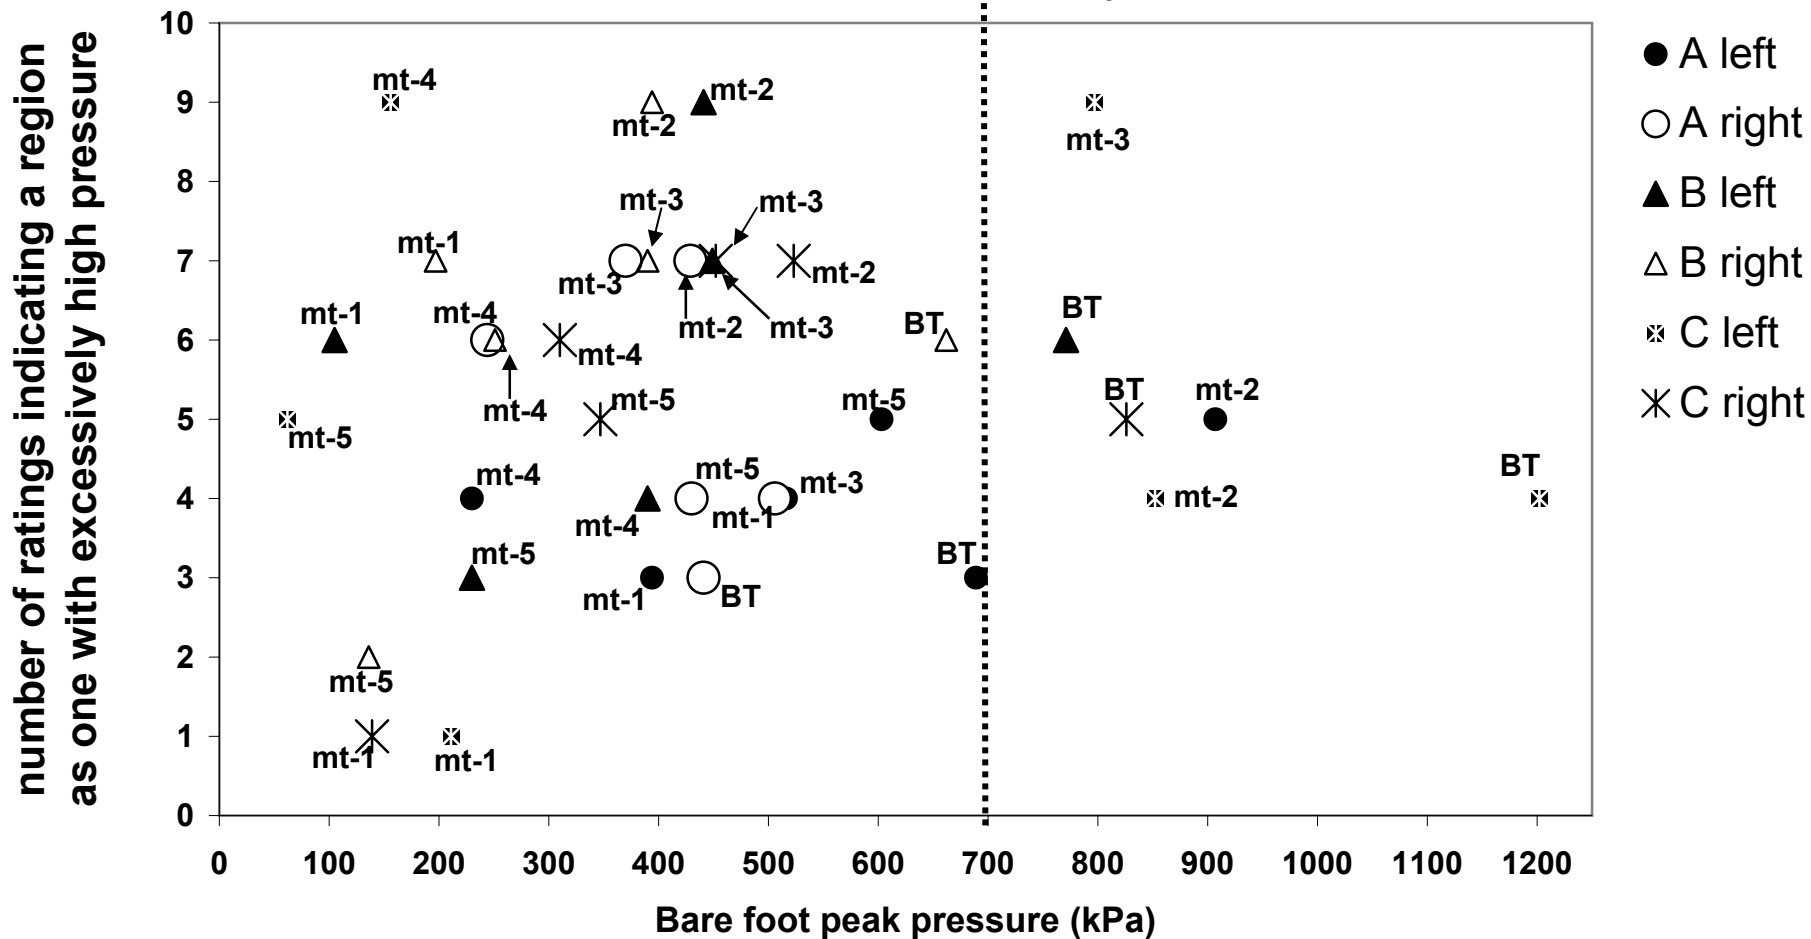

Supplement: MOESM3 [file 9510898]
